# Supplementary material for: Correlation between In Vitro Neutralization Assay and Serological Tests for Protective Antibodies Detection
Source: MDPI journal article supplement (doi:10.3390/ijms23179566), 2022-08-24
Supplement: s1 [file s1]

# Correlation between In Vitro Neutralization Assay and Serological Tests for Protective Antibodies Detection

Maria Addolorata Bonifacio <sup>1,†</sup>, Riccardo Laterza <sup>1,†</sup>, Angela Vinella <sup>1</sup>, Annalisa Schirinzi <sup>2</sup>, Mariangela Defilippis <sup>3</sup>, Francesca Di Serio <sup>2</sup>, Angelo Ostuni <sup>3</sup>, Antonio Fasanella <sup>4</sup> and Maria Addolorata Mariggio <sup>1,\*</sup>

<sup>1</sup> Department of Biomedical Sciences and Human Oncology, University of Bari Aldo Moro Medical School, 70124 Bari, Italy;

<sup>2</sup> Clinical Pathology Unit, University of Bari Aldo Moro, 70124 Bari, Italy;

<sup>3</sup> Immunohematology and Transfusion Medicine Service, Azienda Ospedaliero-Universitaria Consorziale Policlinico di Bari, University of Bari "Aldo Moro", 70124 Bari, Italy;

<sup>4</sup> Istituto Istituto Zooprofilattico Sperimentale della Puglia e della Basilicata, 71121 Foggia, Italy;

\* Correspondence: mariaaddolorata.mariggio@uniba.it

† These authors equally contributed to the work.

**Table S1.** Samples tested and quantitative data recorded through each test. ND = not determined.

| Patient ID | PRNT (1:X) | Roche Elecsys®<br>Anti Spike test (U/mL) | Snibe MAGLUMI®<br>S-RBD IgG test (AU/mL) | Snibe MAGLUMI®<br>S/N IgG test (AU/mL) | EUROIMMUN®<br>NeutraLISA assay (% IH) |
|------------|------------|------------------------------------------|------------------------------------------|----------------------------------------|---------------------------------------|
| 1          | 320        | ND                                       | ND                                       | ND                                     | 98,5                                  |
| 2          | 320        | 52                                       | 32,7                                     | 9,41                                   | 93,2                                  |
| 3          | 320        | 649                                      | 206,0                                    | 5,50                                   | 74,5                                  |
| 4          | 320        | 1975                                     | 185,5                                    | 3,35                                   | 79,6                                  |
| 5          | 320        | 228                                      | 83,0                                     | 4,30                                   | 97,3                                  |
| 6          | 320        | 2158                                     | 341,0                                    | 12,00                                  | 96,6                                  |
| 7          | 320        | 257                                      | 75,5                                     | 5,80                                   | 93,3                                  |
| 8          | 320        | ND                                       | ND                                       | ND                                     | 98,9                                  |
| 9          | 320        | ND                                       | ND                                       | ND                                     | 55,4                                  |
| 10         | 320        | 48                                       | 33,0                                     | 5,94                                   | 30,1                                  |
| 11         | 320        | 1453                                     | 791,7                                    | 14,94                                  | 97,7                                  |
| 12         | 320        | 118                                      | 52,9                                     | 4,14                                   | 95,2                                  |
| 13         | 320        | 1056                                     | 44,7                                     | 3,97                                   | 68,5                                  |
| 14         | 320        | 164                                      | 70,4                                     | 5,14                                   | 90,7                                  |
| 15         | 320        | 317                                      | 33,1                                     | 2,90                                   | 49,9                                  |
| 16         | 320        | 1681                                     | 230,0                                    | 6,60                                   | 94,4                                  |
| 17         | 320        | 2294                                     | 713,0                                    | 40,13                                  | 97,1                                  |
| 18         | 160        | 459                                      | 195,0                                    | 11,00                                  | 94,8                                  |
| 19         | 160        | 500                                      | 432,0                                    | 20,00                                  | 92,6                                  |
| 20         | 160        | 121                                      | 163,2                                    | 4,54                                   | 53,5                                  |
| 21         | 160        | 354                                      | 164,0                                    | 3,60                                   | 85,4                                  |
| 22         | 160        | 234                                      | 78,0                                     | 17,00                                  | 86,3                                  |
| 23         | 160        | 549                                      | 212,7                                    | 11,50                                  | 95,5                                  |
| 24         | 160        | 521                                      | 159,6                                    | 7,50                                   | 97,4                                  |
| 25         | 160        | 228                                      | 41,3                                     | 5,37                                   | 55,7                                  |
| 26         | 160        | 210                                      | 78,5                                     | 24,60                                  | 80,7                                  |
| 27         | 160        | 637                                      | 242,2                                    | 7,48                                   | 97,8                                  |
| 28         | 160        | 110                                      | 35,9                                     | 6,68                                   | 88,6                                  |
| 29         | 160        | 237                                      | 63,1                                     | 2,24                                   | 79,6                                  |

|    |     |     |       |       |         |
|----|-----|-----|-------|-------|---------|
| 30 | 160 | 129 | 39,0  | 3,60  | 63,3    |
| 31 | 160 | 752 | 447,0 | 16,00 | 94,2    |
| 32 | 160 | ND  | ND    | ND    | 84,7    |
| 33 | 160 | ND  | ND    | ND    | 23,6    |
| 34 | 160 | ND  | ND    | ND    | 66,9    |
| 35 | 160 | ND  | ND    | ND    | 78,7    |
| 36 | 160 | ND  | ND    | ND    | 69,4    |
| 37 | 160 | 588 | 528,0 | 20,00 | 97,6    |
| 38 | 160 | 143 | 69,0  | 6,00  | 83,4    |
| 39 | 80  | 338 | 21,0  | 4,50  | 23,6    |
| 40 | 80  | 179 | 54,0  | 2,80  | 60,8    |
| 41 | 80  | 104 | 37,0  | 2,80  | 62,5    |
| 42 | 80  | 93  | 32,0  | 4,80  | 61,8    |
| 43 | 80  | 20  | ND    | ND    | -37,1   |
| 44 | 80  | 92  | 20,3  | 2,01  | 56,0    |
| 45 | 80  | 167 | 23,4  | 3,10  | 20,3    |
| 46 | 80  | 146 | 26,2  | 1,85  | 48,9    |
| 47 | 80  | 88  | 27,2  | 4,42  | 36,4    |
| 48 | 80  | 231 | 83,1  | 16,50 | 79,5    |
| 49 | 80  | 155 | 45,2  | 2,66  | 50,4    |
| 50 | 80  | 194 | 51,2  | 4,54  | 55,8    |
| 51 | 80  | 192 | 24,0  | 25,00 | 77,5    |
| 52 | 80  | 389 | 24,0  | 1,10  | 45,4    |
| 53 | 80  | 608 | 137,0 | 5,90  | 94,6    |
| 54 | 80  | 188 | 66,0  | 14,00 | 81,6    |
| 55 | 80  | 153 | 40,0  | 5,00  | 54,4    |
| 56 | 80  | 245 | 114,0 | 1,50  | 89,2    |
| 57 | 80  | ND  | ND    | ND    | 56,3    |
| 58 | 80  | ND  | ND    | ND    | 0 -15,2 |
| 59 | 40  | 66  | 34,6  | 1,12  | 30,7    |
| 60 | 40  | 248 | 67,3  | 2,13  | 71,0    |
| 61 | 40  | 35  | 14,8  | 2,40  | 0 -7,9  |
| 62 | 40  | 120 | 24,9  | 2,71  | 39,6    |
| 63 | 40  | 66  | 45,5  | 4,96  | 69,3    |
| 64 | 40  | 31  | 11,6  | 0,35  | 0 -6,8  |
| 65 | 40  | 11  | 19,6  | 0,71  | 0 -10,8 |
| 66 | 40  | 183 | 17,7  | 2,48  | 14,1    |
| 67 | 40  | 11  | 12,0  | 0,11  | 0 -12,2 |
| 68 | 40  | 138 | 33,0  | 1,40  | 43,8    |
| 69 | 40  | 11  | 11,0  | 4,90  | 0 -9,9  |
| 70 | 40  | 6   | 4,4   | 0,06  | 0 -15,8 |
| 71 | 40  | 9   | 11,0  | 9,70  | 0 -20,0 |
| 72 | 40  | 316 | 27,0  | 0,80  | 34,5    |
| 73 | 40  | 10  | 17,0  | 8,00  | 0 -14,6 |
| 74 | 40  | 14  | 25,0  | 1,26  | 1,5     |
| 75 | 40  | 48  | 22,0  | 0,97  | 23,3    |
| 76 | 40  | 26  | 22,0  | 0,40  | 12,4    |

---

|    |    |      |      |       |           |
|----|----|------|------|-------|-----------|
| 77 | 40 | 17   | 25,0 | 0,06  | 33,5      |
| 78 | 40 | 45   | 32,0 | 13,00 | 48,5      |
| 79 | 40 | 1    | 10,0 | 0,01  | 0 -36,2   |
| 80 | 40 | 54   | 22,0 | 34,00 | 31,5      |
| 81 | 40 | 17   | 5,9  | 0,42  | 0 -20,3   |
| 82 | 40 | 4,15 | 2,1  | 0,16  | 0 -29,529 |
| 83 | 40 | 123  | 21   | 0,61  | 21,826    |

**Table S2.** Optimized parameters from the ROC curves, calculated by odds ratio, relevant to each of the serological assay.

| Test                           | AUC   | Cut-off    | Accuracy | Sensitivity | Specificity |
|--------------------------------|-------|------------|----------|-------------|-------------|
| Roche Elecsys® Anti Spike test | 0.843 | 459 U/mL   | 0.767    | 0.467       | 0.977       |
| Snibe MAGLUMI® S-RBD IgG test  | 0.916 | 33.0 AU/mL | 0.806    | 0.967       | 0.691       |
| Snibe MAGLUMI® S/N IgG test    | 0.802 | 2.9 AU/mL  | 0.764    | 0.967       | 0.619       |
| EUROIMMUN® NeutraLISA assay    | 0.921 | 53.5 %     | 0.805    | 0.972       | 0.659       |
